# Supplementary material
Source: PubMed Central journal article supplement (PMC3044205)
Supplement: supp_kfq379_toxsci-10-0750-File010.pdf [file supp_kfq379_toxsci-10-0750-File010.pdf]

## SUPPLEMENTARY TABLES

Supplementary Table 1. List of perfluoroalkyl acids and fluorotelomers tested in rainbow trout.

| Common name                                  | Abbreviation       | Molecular Formula                                                | CAS No.    |
|----------------------------------------------|--------------------|------------------------------------------------------------------|------------|
| <i>Perfluoroalkyl carboxylic acids</i>       |                    |                                                                  |            |
| Perfluoropentanoic acid                      | PFPA               | C <sub>5</sub> HF <sub>9</sub> O <sub>2</sub>                    | 2706-90-3  |
| Perfluorohexanoic acid                       | PFH <sub>x</sub> A | C <sub>6</sub> HF <sub>11</sub> O <sub>2</sub>                   | 307-24-4   |
| Perfluoroheptanoic acid                      | PFHpA              | C <sub>7</sub> HF <sub>13</sub> O <sub>2</sub>                   | 375-85-9   |
| Perfluorooctanoic acid                       | PFOA               | C <sub>8</sub> HF <sub>15</sub> O <sub>2</sub>                   | 335-67-1   |
| Perfluorononanoic acid                       | PFNA               | C <sub>9</sub> HF <sub>17</sub> O <sub>2</sub>                   | 375-95-1   |
| Perfluorodecanoic acid                       | PFDA               | C <sub>10</sub> HF <sub>19</sub> O <sub>2</sub>                  | 335-76-2   |
| Perfluoroundecanoic acid                     | PFUnDA             | C <sub>11</sub> HF <sub>21</sub> O <sub>2</sub>                  | 2058-94-8  |
| Perfluorododecanoic acid                     | PFDoDA             | C <sub>12</sub> HF <sub>23</sub> O <sub>2</sub>                  | 307-55-1   |
| Perfluorotridecanoic acid                    | PFTTrDA            | C <sub>13</sub> HF <sub>25</sub> O <sub>2</sub>                  | 72629-94-8 |
| Perfluorotetradecanoic acid                  | PFTDA              | C <sub>14</sub> HF <sub>27</sub> O <sub>2</sub>                  | 376-06-7   |
| <i>Perfluoroalkyl sulfonates</i>             |                    |                                                                  |            |
| Perfluorooctane sulfonic acid potassium salt | PFOS               | C <sub>8</sub> HF <sub>17</sub> KO <sub>3</sub> S                | 2795-39-3  |
| Perfluorodecane sulfonic acid ammonium salt  | PFDS               | C <sub>10</sub> H <sub>4</sub> F <sub>21</sub> NO <sub>3</sub> S | 67906-42-7 |
| <i>Fluorotelomers</i>                        |                    |                                                                  |            |
| 6:2 Fluorotelomer alcohol                    | 6:2FtOH            | C <sub>8</sub> H <sub>5</sub> F <sub>13</sub> O                  | 647-42-7   |
| 8:2 Fluorotelomer alcohol                    | 8:2FtOH            | C <sub>10</sub> H <sub>5</sub> F <sub>17</sub> O                 | 678-39-7   |
| 8:2 Fluorotelomer acrylate                   | 8:2FtOAc           | C <sub>13</sub> H <sub>7</sub> F <sub>17</sub> O <sub>2</sub>    | 27905-45-9 |

Note: Chemical Abstract Service (CAS) registry numbers may be referenced at National Library of Medicine ChemID website: <http://chem.sis.nlm.nih.gov/chemidplus/>.

**Supplementary Table 2. Effects of select perfluoroalkyl acids and fluorotelomers (including a mixture) administered via the diet on morphological parameters in trout (experiment 1).**

| Treatment                                            | Diet (ppm) | Body wt (g) | Liver wt (g) | LSI (%)       |
|------------------------------------------------------|------------|-------------|--------------|---------------|
| Control                                              | -          | 75.0 ± 4.4  | 0.66 ± 0.03  | 0.91 ± 0.03   |
| Vehicle                                              | -          | 73.1 ± 8.0  | 0.67 ± 0.06  | 0.94 ± 0.05   |
| E2                                                   | 5          | 82.9 ± 6.7  | 0.93 ± 0.10* | 1.20 ± 0.05** |
| <i>C8 to C11 perfluoroalkyl carboxylic acids</i>     |            |             |              |               |
| PFOA                                                 | 5          | 50.6 ± 6.0* | 0.69 ± 0.04  | 1.43 ± 0.14** |
|                                                      | 50         | 54.5 ± 9.3  | 0.65 ± 0.08  | 1.25 ± 0.09** |
|                                                      | 250        | 62.2 ± 5.2  | 0.69 ± 0.19  | 1.12 ± 0.06** |
| PFNA                                                 | 5          | 69.1 ± 8.8  | 0.70 ± 0.06  | 1.04 ± 0.06   |
|                                                      | 50         | 78.0 ± 6.2  | 0.74 ± 0.04  | 0.95 ± 0.03   |
|                                                      | 250        | 61.9 ± 7.1  | 0.65 ± 0.06  | 1.08 ± 0.05*  |
| PFDA                                                 | 5          | 63.5 ± 3.9  | 0.60 ± 0.03  | 0.95 ± 0.05   |
|                                                      | 50         | 85.2 ± 7.7  | 0.92 ± 0.11  | 1.11 ± 0.12   |
|                                                      | 250        | 63.2 ± 7.0  | 0.76 ± 0.08  | 1.31 ± 0.23*  |
| PFUnDA                                               | 5          | 76.5 ± 10.5 | 0.80 ± 0.09  | 1.09 ± 0.11   |
|                                                      | 50         | 77.4 ± 7.7  | 0.62 ± 0.05  | 0.81 ± 0.05   |
|                                                      | 250        | 62.0 ± 3.3  | 0.64 ± 0.04  | 1.05 ± 0.06   |
| Mixture <sup>a</sup>                                 | 20         | 78.9 ± 9.2  | 0.71 ± 0.07  | 0.92 ± 0.05   |
|                                                      | 200        | 78.6 ± 7.7  | 0.68 ± 0.03  | 0.89 ± 0.07   |
|                                                      | 1000       | 66.2 ± 4.2  | 0.81 ± 0.05  | 1.22 ± 0.05** |
| <i>Other perfluoroalkyl acids and fluorotelomers</i> |            |             |              |               |
| PFHxA                                                | 250        | 64.2 ± 10.2 | 0.61 ± 0.08  | 0.98 ± 0.07   |
| PFHpA                                                | 250        | 65.7 ± 4.6  | 0.63 ± 0.05  | 0.97 ± 0.06   |
| PFDoDA                                               | 250        | 52.7 ± 5.6  | 0.83 ± 0.09  | 1.56 ± 0.05** |
| PFTTrDA                                              | 250        | 58.2 ± 5.4  | 0.60 ± 0.03  | 1.07 ± 0.09   |
| PFOS                                                 | 250        | 70.3 ± 5.9  | 0.70 ± 0.06  | 1.00 ± 0.05   |
| PFDS                                                 | 250        | 71.7 ± 7.4  | 0.77 ± 0.07  | 1.08 ± 0.04   |
| 6:2FtOH                                              | 250        | 73.1 ± 4.5  | 0.78 ± 0.05  | 1.07 ± 0.05   |
| 8:2FtOH                                              | 250        | 67.3 ± 9.0  | 0.83 ± 0.07  | 1.34 ± 0.21** |
| 8:2FtOAc                                             | 250        | 68.3 ± 8.4  | 0.78 ± 0.07  | 1.16 ± 0.05*  |

*Note:* Mean body weight, liver weight and LSI values are shown ± SEM. Measurements were made following two weeks of dietary exposure to indicated treatments. \*,  $P < 0.05$ ; \*\*,  $P < 0.01$  compared to the Control treatment as determined by one-way ANOVA with Dunnett's multiple comparisons post-hoc test. Sample size differed among some groups because extra positive and negative controls were included for multiple sampling days. Sample sizes are as follows: control,  $N = 24$ ; E2,  $N = 12$ , all others  $N = 6$ . One death occurred in each of the PFDoDA and 8:2 FtOAc treatment groups.

<sup>a</sup>Mixtures were prepared by adding equal amounts of PFOA, PFNA, PFDA and PFUnDA to achieve indicated total perfluoroalkyl carboxylic acid concentrations as described in the *Materials and Methods*.

**Supplementary Table 3. PFOA and PFDA blood levels in rainbow trout following two-week dietary exposure and effects on morphological parameters (experiment 2).**

| Treatment      | Plasma PFOA<br>( $\mu\text{M}$ ) | Plasma PFDA<br>( $\mu\text{M}$ ) | Body weight<br>(g) | Liver weight<br>(g) | LSI<br>(%)        |
|----------------|----------------------------------|----------------------------------|--------------------|---------------------|-------------------|
| Control        | <LLQ                             | <LLQ                             | 30.9 $\pm$ 8.2     | 0.27 $\pm$ 0.08     | 0.87 $\pm$ 0.11   |
| 5 ppm E2       | <LLQ                             | <LLQ                             | 28.6 $\pm$ 4.2     | 0.35 $\pm$ 0.06*    | 1.22 $\pm$ 0.08** |
| 0.026          | 0.02 $\pm$ 0.01                  | nd <sup>a</sup>                  | 29.1 $\pm$ 4.9     | 0.23 $\pm$ 0.09     | 0.85 $\pm$ 0.19   |
| 0.128          | 0.10 $\pm$ 0.03                  | nd                               | 26.1 $\pm$ 7.5     | 0.21 $\pm$ 0.08     | 0.72 $\pm$ 0.21*  |
| 0.64 ppm PFOA  | 0.24 $\pm$ 0.08                  | nd                               | 29.2 $\pm$ 5.7     | 0.24 $\pm$ 0.05     | 0.84 $\pm$ 0.13   |
| 3.2 ppm PFOA   | 2.43 $\pm$ 0.98                  | nd                               | 28.8 $\pm$ 6.5     | 0.24 $\pm$ 0.05     | 0.80 $\pm$ 0.09   |
| 16 ppm PFOA    | 12.6 $\pm$ 3.95                  | nd                               | 28.9 $\pm$ 7.4     | 0.23 $\pm$ 0.07     | 0.86 $\pm$ 0.14   |
| 80 ppm PFOA    | 46.6 $\pm$ 16.0                  | nd                               | 26.0 $\pm$ 5.9     | 0.23 $\pm$ 0.05     | 0.76 $\pm$ 0.08   |
| 400 ppm PFOA   | 158 $\pm$ 25.7                   | nd                               | 30.2 $\pm$ 5.2     | 0.25 $\pm$ 0.05     | 0.85 $\pm$ 0.15   |
| 2000 ppm PFOA  | 508 $\pm$ 99.7                   | nd                               | 29.3 $\pm$ 3.0     | 0.33 $\pm$ 0.08     | 1.10 $\pm$ 0.15*  |
| 0.026 ppm PFDA | nd                               | 0.09 $\pm$ 0.01                  | 30.6 $\pm$ 5.8     | 0.30 $\pm$ 0.05     | 0.99 $\pm$ 0.17   |
| 0.128 ppm PFDA | nd                               | 0.40 $\pm$ 0.07                  | 29.7 $\pm$ 8.5     | 0.30 $\pm$ 0.11     | 1.00 $\pm$ 0.12   |
| 0.64 ppm PFDA  | nd                               | 2.29 $\pm$ 0.57                  | 27.6 $\pm$ 2.9     | 0.29 $\pm$ 0.06     | 1.04 $\pm$ 0.15*  |
| 3.2 ppm PFDA   | nd                               | 10.7 $\pm$ 1.95                  | 28.7 $\pm$ 4.9     | 0.26 $\pm$ 0.05     | 0.91 $\pm$ 0.09   |
| 16 ppm PFDA    | nd                               | 46.9 $\pm$ 11.1                  | 31.4 $\pm$ 7.5     | 0.28 $\pm$ 0.07     | 0.88 $\pm$ 0.09   |
| 80 ppm PFDA    | nd                               | 246 $\pm$ 29.3                   | 29.4 $\pm$ 7.6     | 0.29 $\pm$ 0.08     | 0.98 $\pm$ 0.16   |
| 400 ppm PFDA   | nd                               | 705 $\pm$ 96.2                   | 30.2 $\pm$ 6.2     | 0.36 $\pm$ 0.09*    | 1.20 $\pm$ 0.17** |
| 2000 ppm PFDA  | nd                               | 1365 $\pm$ 300                   | 25.9 $\pm$ 4.2     | 0.38 $\pm$ 0.07*    | 1.45 $\pm$ 0.09** |

*Note:* Nominal concentrations of PFOA or PFDA in the diet (mg/kg) are indicated. Average measured plasma PFOA or PFDA blood concentration, body weight, liver weight and LSI values are shown  $\pm$  SEM ( $N = 16$  for Control and E2 groups;  $N = 8$  for all PFOA and PFDA groups). For liver weight and LSI values, \* indicates  $p < 0.05$  and \*\* indicates  $p < 0.01$  compared to the Control treatment as determined by one-way ANOVA with Dunnett's multiple comparisons post-hoc test. The lower limit of quantitation (LLQ) for PFOA and PFDA was 5 ng/ml plasma or 12 nM and 9.7 nM, respectively.

<sup>a</sup> nd, not determined
