# Supplementary material
Source: PubMed Central journal article supplement (PMC3044205)
Supplement: supp_kfq379_toxsci-10-0750-File011.pdf [file supp_kfq379_toxsci-10-0750-File011.pdf]

## SUPPLEMENTARY FIGURES

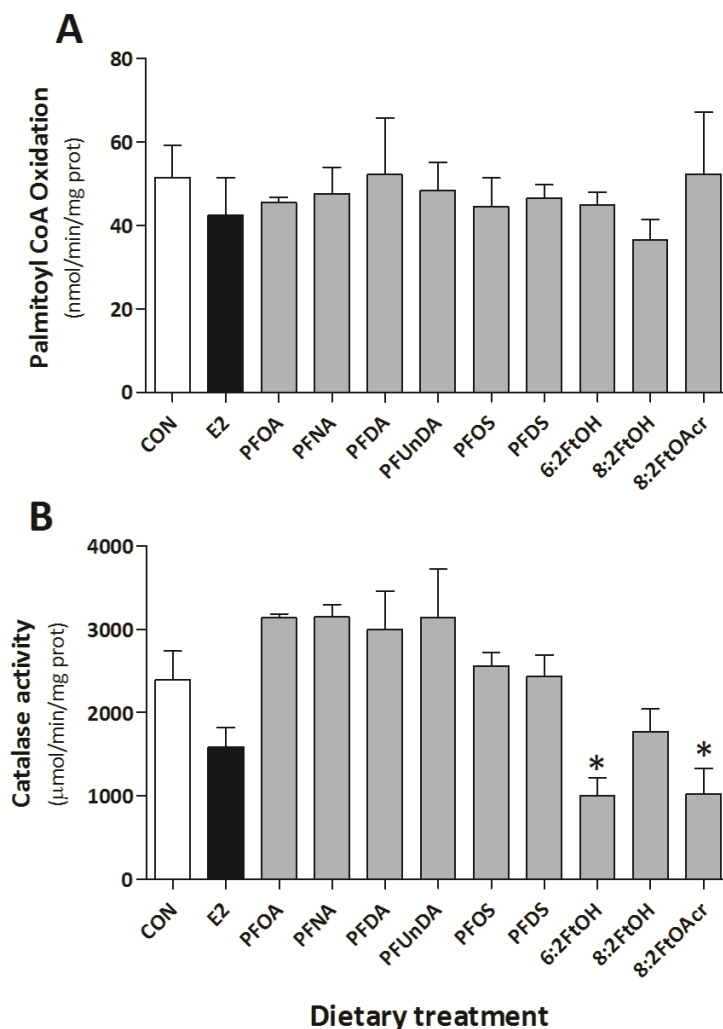**Supplementary Figure 1. Impact of dietary PFCs on enzyme markers of peroxisome proliferation.**

Mean rates of palmitoyl CoA oxidation (A) and catalase activity (B) are shown + SEM ( $N = 18$  for control,  $N = 12$  for E2, and  $N = 6$  for all other treatments). The diet concentration was 250 ppm (approximately 5 mg/kg bw/day) for all perfluoroalkyl compounds and 5 ppm for E2, the positive control. \*,  $p < 0.05$  compared to the control treatment group as determined by one-way ANOVA with Dunnett's multiple comparisons post-hoc test.

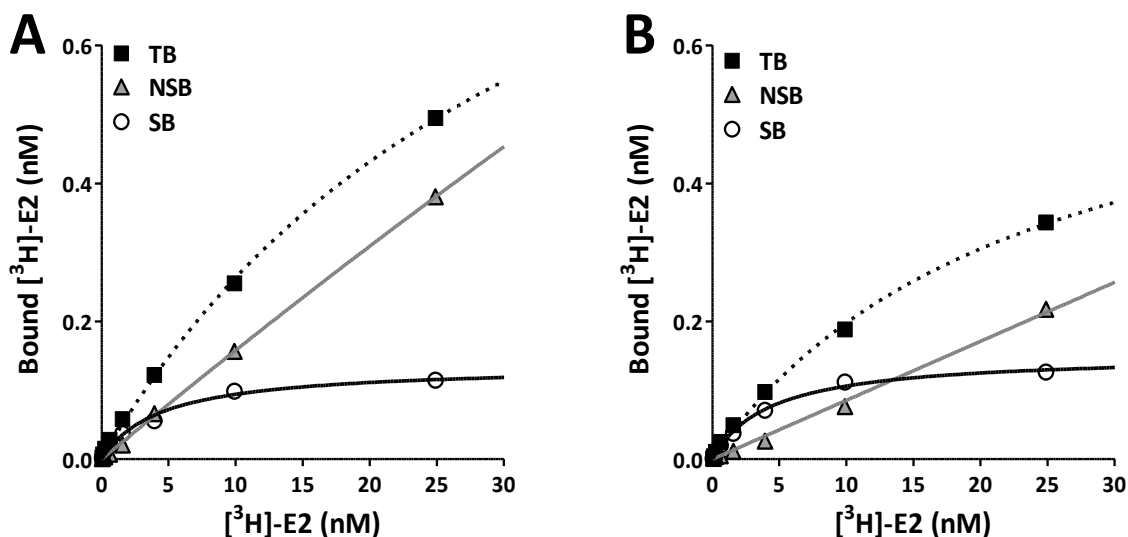

**Supplementary Figure 2.** Saturation analysis of [<sup>3</sup>H]-E2 binding in juvenile rainbow trout liver. Binding characteristics of the estrogen receptor were compared in liver cytosol extracts obtained from juvenile rainbow trout fed control diet (A) or trout fed diet supplemented with 5 mg/kg E2 (B) for two weeks. Saturation plots of [<sup>3</sup>H]-E2 binding in trout liver cytosol extracts are shown, and each symbol represents the mean of triplicate observations. Total binding, TB; specific binding, SB; and non-specific binding, NSB. A non-linear regression model for one-site binding was used to calculate values for the dissociation constant ( $K_d$ ) and maximum number of binding sites ( $B_{max}$ ), which are as follows: control liver cytosol,  $K_d = 4.4 \pm 0.7$  nM,  $B_{max} = 136$  pM; E2 liver cytosol,  $K_d = 4.3 \pm 0.4$  nM,  $B_{max} = 151$  pM.



**A) mER $\alpha$** 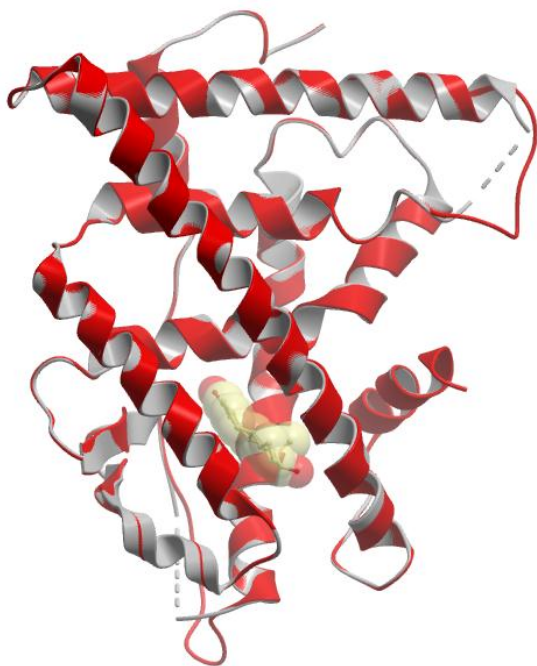**B) rtER $\alpha$ 1**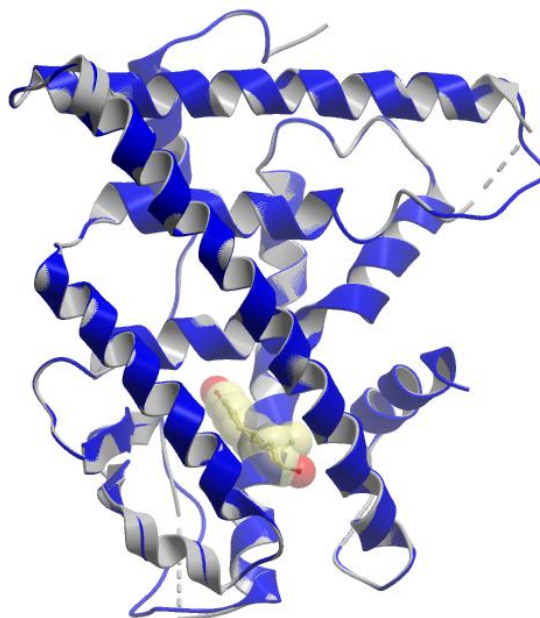

**Supplementary Figure 4.** Superimposition of mouse and trout ER $\alpha$  homology models with the human ER $\alpha$  crystal structure. Overlay plots were created using the SuperImpose algorithm in ICM-Browser (Molsoft). In both panels, hER $\alpha$  is represented in gray, whereas mER $\alpha$  (A) is shown in red and rtER $\alpha$ 1 (B) is shown in blue. E2 is shown as a stick/space-filling model in both plots in the orientation determined by the hER $\alpha$  crystal structure (PDB accession 1ERE).

**mER $\alpha$** **A) E2**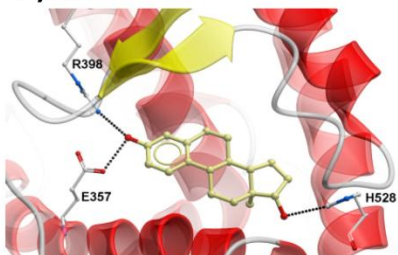**B) DES**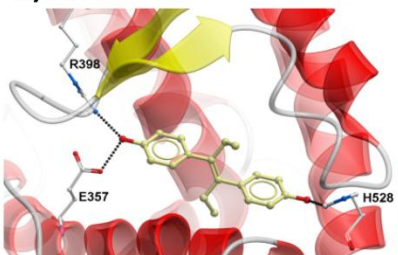**C) GEN**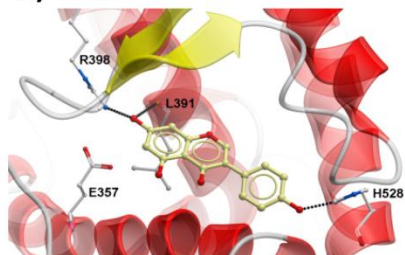**D) BPA**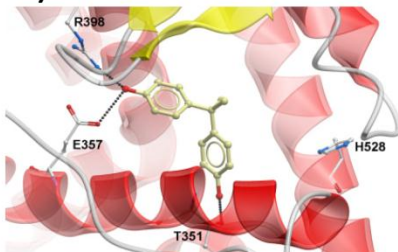**E) NP**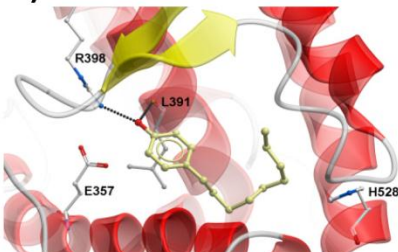**F) PFHpA**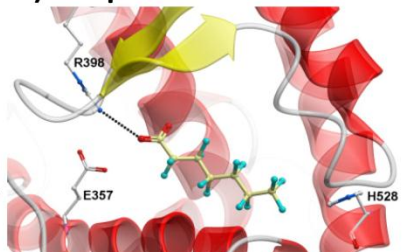**G) PFOA**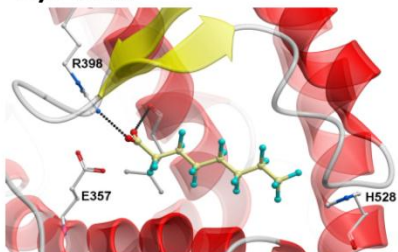**H) PFNA**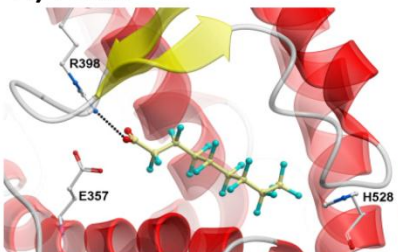**I) PFDA**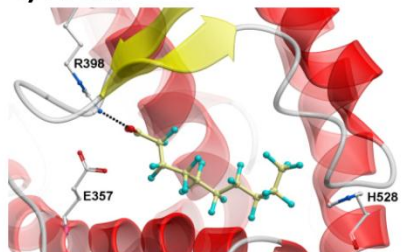**J) PFUnDA**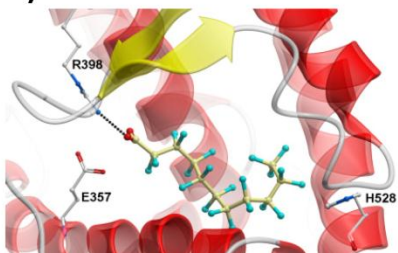**K) PFOS**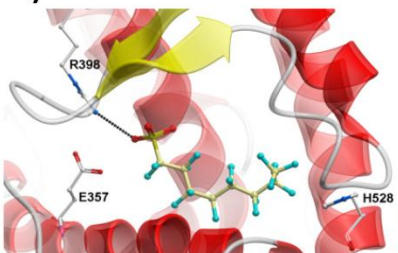**L) PFDS**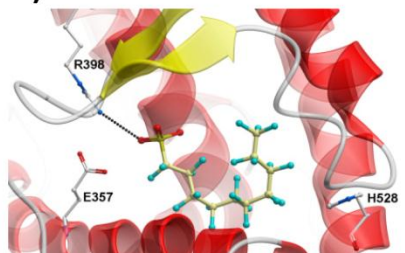**M) 6:2FtOH**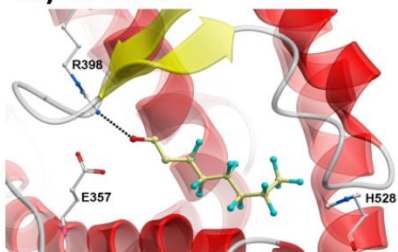**N) 8:2FtOH**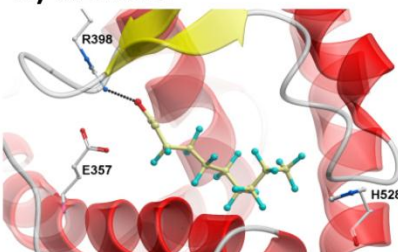**O) 8:2FtOAc**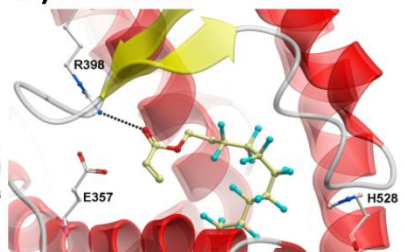

(Previous page)

**Supplementary Figure 5. *In silico* model showing docking of estrogens and select polyfluorinated chemicals into the mER $\alpha$  ligand-binding domain.** Docking of test ligands into the mER $\alpha$  ligand-binding domain was performed using Molsoft ICM, and the lowest ICM-scored poses for each calculated ligand-protein docking are shown. Ligands are colored by atom type (the carbon atoms in tan) and are displayed as ball and sticks. Relevant protein residues are displayed as ball and sticks and colored by atom type: carbon atoms in gray, oxygen in red, sulfur in yellow and fluorine in cyan. Hydrogen bonds are represented by black dotted lines between the donor (*D*) and the acceptor (*A*) and are defined as follows: Distance *D*---*A*: 2.8-3.2 Å; Angle *D*-H---*A*: 140-180°.



**rtER $\alpha$** **A) E2**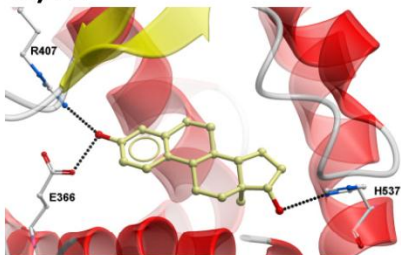**B) DES**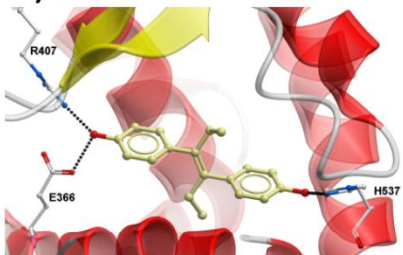**C) GEN**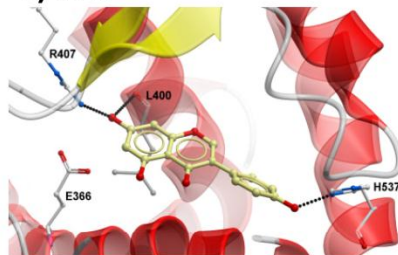**D) BPA**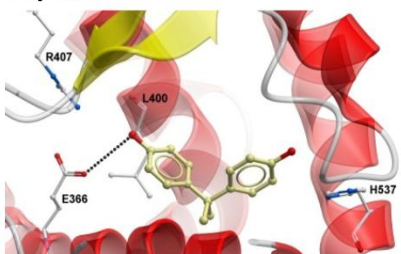**E) NP**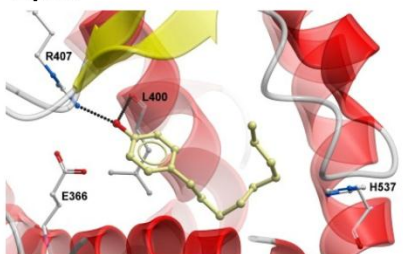**F) PFHpA**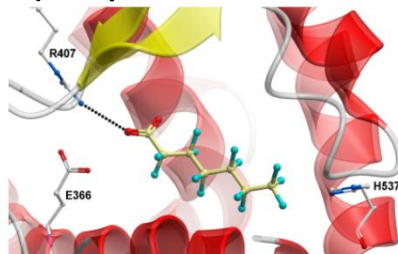**G) PFOA**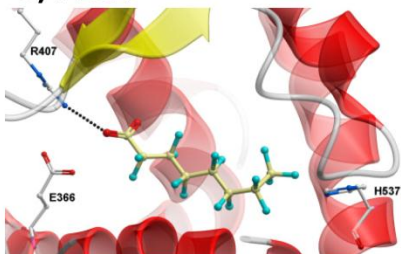**H) PFNA**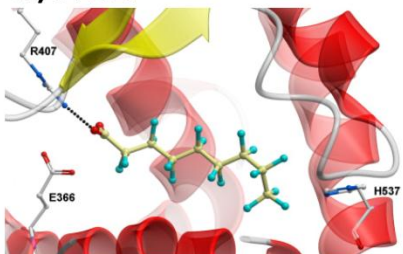**I) PFDA**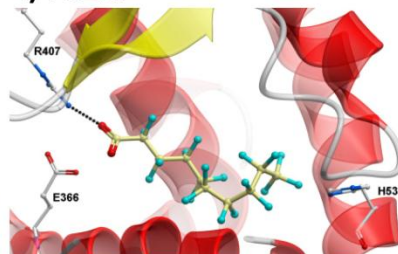**J) PFUnDA**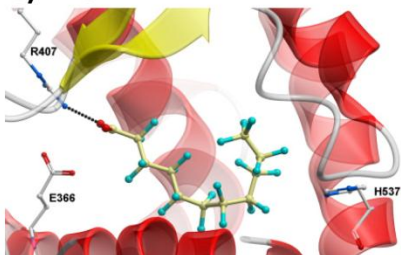**K) PFOS**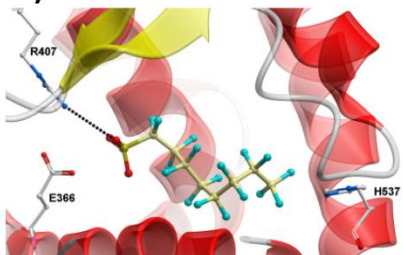**L) PFDS**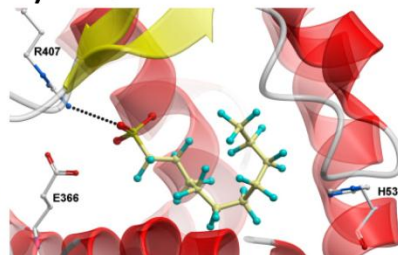**M) 6:2FtOH**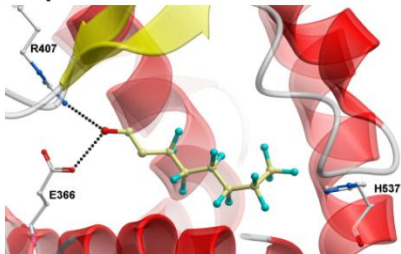**N) 8:2FtOH**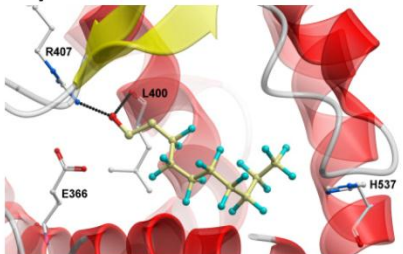**O) 8:2FtOAc**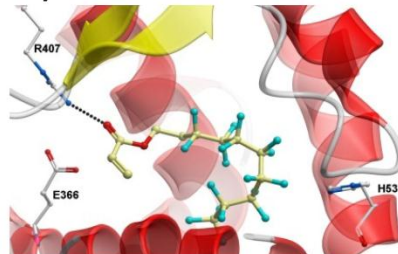

(Previous page)

**Supplementary Figure 6. *In silico* model showing docking of estrogens and select polyfluorinated chemicals into the rtER $\alpha$ 1 ligand-binding domain.** Docking of test ligands into the rtER $\alpha$ 1 ligand-binding domain was performed using Molsoft ICM, and the lowest ICM-scored poses for each calculated ligand-protein docking are shown. Ligands are colored by atom type (the carbon atoms in tan) and are displayed as ball and sticks. Relevant protein residues are displayed as ball and sticks and colored by atom type: carbon atoms in gray, oxygen in red, sulfur in yellow and fluorine in cyan. Hydrogen bonds are represented by black dotted lines between the donor (*D*) and the acceptor (*A*) and are defined as follows: Distance *D*---*A*: 2.8-3.2 Å; Angle *D*-H---*A*: 140-180°.





commonly used for toxicity testing. This figure shows the relevant portion of the ligand-binding domain region (*e.g.*, amino acids 311 to 564 for human ESR1) and the putative sites of estrogen hydrogen-bonding for ER $\alpha$  and corresponding alignment with ER $\beta$  proteins at the indicated glutamic acid, arginine and histidine residues (shaded in black). Symbols in the last line indicate the level of similarity of the sequences: the star represents conserved residues, the colon indicates highly similar residues, and the dot indicates weakly similar residues.
